# Supplementary material for: Molecular and Physiological Diversity of Indigenous Yeasts Isolated from Spontaneously Fermented Wine Wort from Ilfov County, Romania
Source: MDPI journal article supplement (doi:10.3390/microorganisms11010037), 2022-12-22
Supplement: s1 [file s1]

## Supplementary file

# Molecular and physiologic diversity of indigenous yeasts isolated from spontaneously fermented wine wort from Ilfov county, Romania

Viorica Maria Corbu <sup>1,\*</sup>, Ortansa Csutak <sup>1</sup>

<sup>1</sup> Department of Genetics, Faculty of Biology, University of Bucharest, 060101, Bucharest, Romania;  
\* Correspondence: viorica.corbu@yahoo.com;

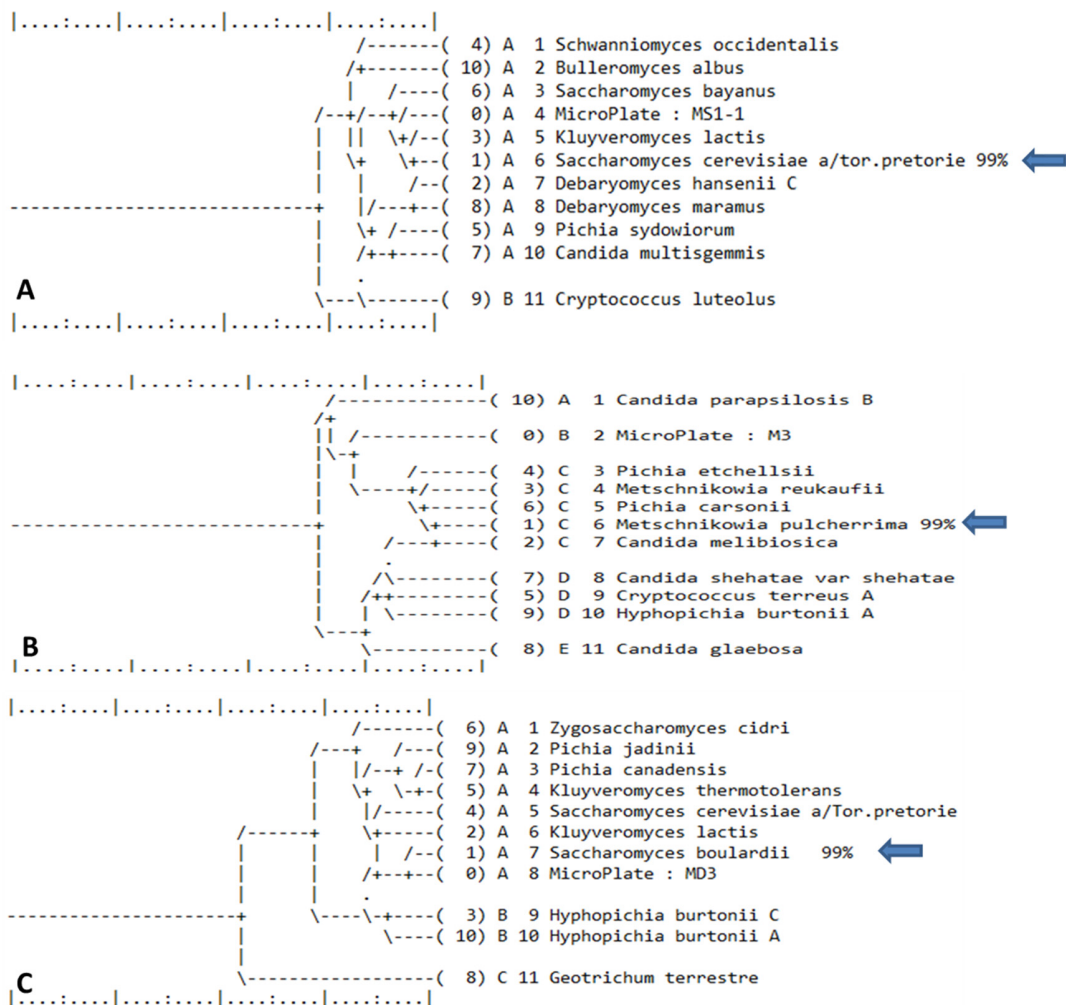

**Figure S1.** Appearance of the phenotypic phylogeny dendrograms generated using the Biolog Microbial ID System (MicroStation™ System MicroLog version 4.2) for the strains: A- MS1-1; B-M3; C-MDR; whose percentage of similarity identified was >95%

**Table S1.** Metabolic profile obtained using Biolog Microbial ID System after 72 hours of incubation at 28°C

|    |                                 | M1 | M3 | MD3 | MS1-1 | M5 |
|----|---------------------------------|----|----|-----|-------|----|
|    | <b>Oxidation tests results</b>  |    |    |     |       |    |
| 1  | Water                           | M  | M  | M   | M     | M  |
| 2  | Acetic acid                     | S  | -  | -   | -     | -  |
| 3  | Formic acid                     | S  | -  | S   | S     | S  |
| 4  | Propionic acid                  | +  | -  | S   | -     | S  |
| 5  | Succinic acid                   | S  | B  | -   | -     | S  |
| 6  | Succinic acid mono-methyl ester | S  | B  | -   | -     | -  |
| 7  | L-Aspartic acid                 | +  | -  | -   | -     | -  |
| 8  | L-Glutamic Acid                 | S  | B  | -   | -     | -  |
| 9  | L-proline                       | S  | +  | -   | -     | -  |
| 10 | D-Gluconic Acid                 | B  | +  | -   | -     | B  |
| 11 | Dextrin                         | S  | -  | -   | -     | -  |
| 12 | Inulin                          | +  | +  | +   | S     | +  |
| 13 | D-cellobiose                    | +  | +  | S   | S     | -  |
| 14 | Gentiobiose                     | +  | +  | S   | S     | S  |
| 15 | Maltose                         | S  | B  | +   | +     | S  |
| 16 | Maltotriose                     | S  | +  | S   | S     | -  |
| 17 | D-melezitose                    | S  | +  | S   | S     | S  |
| 18 | D- melibiose                    | S  | S  | S   | S     | S  |
| 19 | Palatinose                      | S  | +  | S   | S     | S  |
| 20 | D-raffinose                     | S  | S  | B   | -     | B  |
| 21 | Stachyose                       | S  | S  | -   | -     | B  |
| 22 | Sucrose                         | S  | +  | +   | B     | +  |
| 23 | D-trehalose                     | S  | B  | B   | B     | B  |
| 24 | Turanose                        | S  | B  | B   | B     | -  |
| 25 | N-acetyl D-glucosamine          | S  | +  | S   | S     | S  |
| 26 | $\alpha$ -D glucose             | +  | +  | +   | +     | +  |
| 27 | D-galactose                     | B  | B  | +   | +     | S  |
| 28 | D-psicose                       | -  | B  | S   | S     | -  |
| 29 | L-sorbose                       | S  | +  | S   | S     | -  |
| 30 | Salicin                         | +  | B  | S   | S     | S  |
| 31 | D-mannitol                      | S  | +  | S   | S     | B  |
| 32 | D-sorbitol                      | S  | +  | S   | S     | B  |
| 33 | D-arabitol                      | S  | -  | S   | S     | -  |
| 34 | Xylitol                         | S  | +  | S   | S     | B  |
| 35 | Glycerol                        | S  | -  | S   | S     | -  |
| 36 | Tween 80                        | S  | S  | S   | S     | -  |
|    | <b>Assimilation tests</b>       |    |    |     |       |    |
| 37 | Water                           | M  | M  | M   | M     | M  |

|    |                                 |   |   |   |   |   |
|----|---------------------------------|---|---|---|---|---|
| 38 | Fumaric acid                    | - | B | S | S | S |
| 39 | L-malic acid                    | S | + | S | S | - |
| 40 | Succinic Acid Mono-Methyl Ester | S | B | - | - | - |
| 41 | Bromosuccinic acid              | - | B | S | S | S |
| 42 | L-glutamic acid                 | - | B | S | S | - |
| 43 | $\gamma$ -aminobutyric acid     | - | B | S | S | - |
| 44 | $\alpha$ -Ketoglutaric Acid     | S | B | S | S | S |
| 45 | 2-Keto-D-Gluconic Acid          | + | + | S | S | - |
| 46 | D-gluconic Acid                 | + | + | S | S | - |
| 47 | Dextrin                         | - | - | S | S | - |
| 48 | Inulin                          | + | + | + | + | + |
| 49 | D-cellobiose                    | + | + | - | - | - |
| 50 | Gentiobiose                     | + | B | - | - | S |
| 51 | Maltose                         | S | + | + | B | S |
| 52 | Maltotriose                     | - | B | + | + | - |
| 53 | D-melezitose                    | - | + | - | - | S |
| 54 | D- melibiose                    | S | - | S | S | S |
| 55 | Palatinose                      | - | B | S | S | S |
| 56 | D-raffinose                     | S | - | + | - | B |
| 57 | Stachyose                       | S | S | B | - | B |
| 58 | Sucrose                         | - | B | + | + | + |
| 59 | D-trehalose                     | B | B | + | + | B |
| 60 | Turanose                        | S | B | + | + | - |
| 61 | N-acetyl D-glucosamine          | S | B | S | S | S |
| 62 | D-glucosamine                   | S | B | S | S | - |
| 63 | $\alpha$ -D glucose             | + | + | + | + | + |
| 64 | D-galactose                     | B | B | + | + | S |
| 65 | D-psicose                       | B | B | - | - | S |
| 66 | L-rhamnose                      | - | S | S | S | S |
| 67 | L-sorbose                       | S | B | S | S | S |
| 68 | $\alpha$ -methyl-D-glucoside    | S | B | S | B | S |
| 69 | $\beta$ -methyl-D-glucoside     | + | B | S | S | S |
| 70 | Amygdalin                       | + | B | B | B | B |
| 71 | Arbutin                         | B | B | S | S | S |
| 72 | Salicin                         | B | B | - | - | - |
| 73 | Maltitol                        | B | B | S | S | S |
| 74 | D-Mannitol                      | S | + | S | S | B |
| 75 | D-sorbitol                      | S | B | S | S | B |
| 76 | Adonitol                        | - | B | S | S | S |
| 77 | D-arabitol                      | S | B | - | - | - |
| 78 | Xylitol                         | S | + | - | - | B |
| 79 | <i>i</i> -erythritol            | S | S | - | - | S |
| 80 | glycerol                        | S | B | - | - | - |

|    |                                               |   |   |   |   |   |
|----|-----------------------------------------------|---|---|---|---|---|
| 81 | Tween 80                                      | S | S | S | S | S |
| 82 | L-arabinose                                   | B | S | - | - | S |
| 83 | D-arabinose                                   | B | S | - | - | S |
| 84 | D-ribose                                      | + | - | - | - | - |
| 85 | D-xylose                                      | + | + | - | - | - |
| 86 | Succinic acid Mono-methyl ester plus D-xylose | + | + | B | S | B |
| 87 | N-acetyl-L-glutamic acid plus D-xylose        | + | B | B | S | B |
| 88 | Quinic acid plus D-xylose                     | + | + | - | - | S |
| 89 | D-glucuronic acid plus D-xylose               | + | B | S | S | S |
| 90 | Dextrin plus D-xylose                         | - | B | S | S | S |
| 91 | $\alpha$ -D-Lactose plus D-Xylose             | - | B | S | S | S |
| 92 | D-melibiose plus D-xylose                     | - | B | S | S | S |
| 93 | D-galactose plus D-xylose                     | + | + | + | B | S |
| 94 | m-inositol plus D-xylose                      | - | B | - | - | S |
| 95 | 1,2 propanediol plus D-xylose                 | - | B | B | - | - |
| 96 | Acetoin plus D-xylose                         | B | B | - | - | S |

+ positive; - negative; B- borderline; S- no positive or negative result (the value obtained was less than the one recorded for control well); M-control well

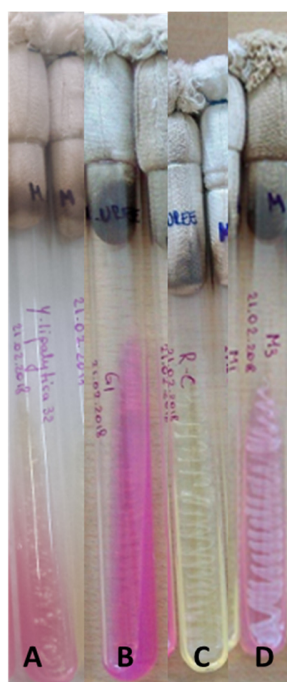

**Figure S2.** Urease test results using Christensen's Urea Agar supplemented with 0,1% glucose after 24 hours of incubation at 28°C (A-*Y. lipolytica* CMGB 32; B- *R. mucilaginosa* CMGB-G1; C- *S. cerevisiae* CMGB-RC; D- M3)

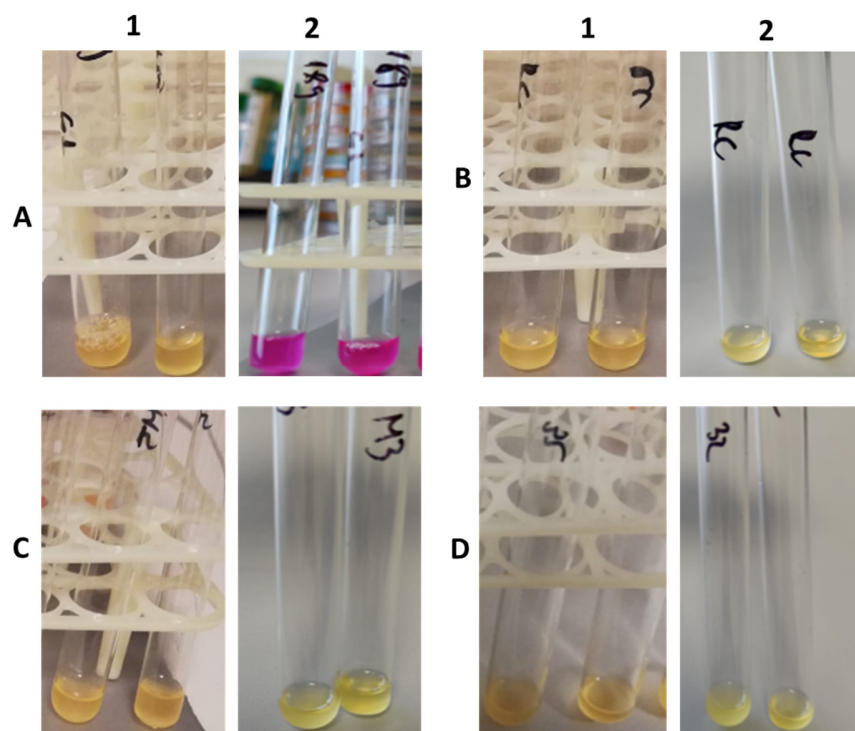

**Figure S3.** Urease test results using Difco Urea Broth 24 hours of incubation at 28°C (A- *R. mucilaginosa* CMGB-G1- positive control; B- *S. cerevisiae* CMGB-RC-negative control; C- M3; D-*Y. lipolytica* CMGB 32; 1- the initial aspect of the test tube after inoculation; 2-the aspect of the test tube after 14 hours of incubation at 37°C)
